# Supplementary material for: Adaptations to Climate-Mediated Selective Pressures in Humans
Source: PLoS Genet. 2011 Apr 21;7(4):e1001375. doi: 10.1371/journal.pgen.1001375 (PMC3080864; doi:10.1371/journal.pgen.1001375)
Supplement: Table S2 — Reanalysis of enrichment of correlations with climate for SNPs in an energy metabolism gene set (first published in Hancock et al., 2008)[25] compared to other genic SNPs. (0.03 MB XLS) [file pgen.1001375.s009.xls]

## Sheet: Sheet1
Supplementary Table 2. Enrichment of correlations with climate for SNPs in an energy metabolism gene set (first published in Hancock et al., 2008) compared to other genic SNPs.
Analysis	Season	Variable	tail cut-off:			Analysis methods
			0.05	0.01	0.005
Illumina 650 only; 61 populations		Latitude	0.861173	0.965108	1.03935	all SNPs genotyped on the Illumina 650Y array that were in the 82 genes that make up this gene set were included and all 61 populations were used in the analysis.
	summer	Maximum Temperature	1.14328	1.55902	1.78174
		Precipitation Rate	1.17298	1.63326	1.63326
		Relative Humidity	1.09874	1.26206	0.890869
		Solar Radiation	0.890869	0.74239	0.890869
	winter	Minimum Temperature	0.876021	0.965108	1.3363
		Precipitation Rate	1.09874	0.81663	0.890869
		Relative Humidity	1.17298	1.26206	1.48478
		Solar Radiation	1.15813	1.11359	1.03935
Illumina 650 only; 52 populations that overlap with Hancock et al., 2008		Latitude	1.03894	0.720508	0.416812	all SNPs genotyped on the Illumina 650Y array that were in the 82 genes that make up this gene set were included and only the 52 populations that overlapped with those used in the 2008 publication were included.
	summer	Maximum Temperature	0.971056	0.67123	0.54668
		Precipitation Rate	1.35873	1.07927	0.494255
		Relative Humidity	1.13795	0.697115	0.588962
		Solar Radiation	1.21377	1.4108	1.04274
	winter	Minimum Temperature	1.0837	1.28987	1.95392
		Precipitation Rate	0.76126	0.628664	0.334444
		Relative Humidity	1.33386	1.11619	0.828384
		Solar Radiation	1.25922	0.922266	1.34267
Illumina 650Y and data from Hancock et al., 2008		Latitude	1.3259	1.62*	1.22517	all SNPs genotyped on the Illumina 650Y array or that were genotyped as part of the 2008 paper that were in the 82 genes that make up this gene set and only the 52 populations that overlapped with those used in the 2008 publication were included.
	summer	Maximum Temperature	1.12825	0.928691	1.08554
		Precipitation Rate	1.34966	1.21954	0.854489
		Relative Humidity	1.15941	0.991404	1.06302
		Solar Radiation	1.31494	1.41883	1.29051
	winter	Minimum Temperature	1.2222	1.59283	2.23**
		Precipitation Rate	0.983969	1.15545	1.38642
		Relative Humidity	1.59***	1.47233	1.47554
		Solar Radiation	1.53**	1.53675	2.05217
Symbols *, ** and *** denote support from >95%, >97.5% and >99% of bootstrap replicate, respectively
