# Supplementary material for: Adaptations to Climate-Mediated Selective Pressures in Humans
Source: PLoS Genet. 2011 Apr 21;7(4):e1001375. doi: 10.1371/journal.pgen.1001375 (PMC3080864; doi:10.1371/journal.pgen.1001375)

Manhattan plots showing the log10BFs for each variable in the worldwide analysis.


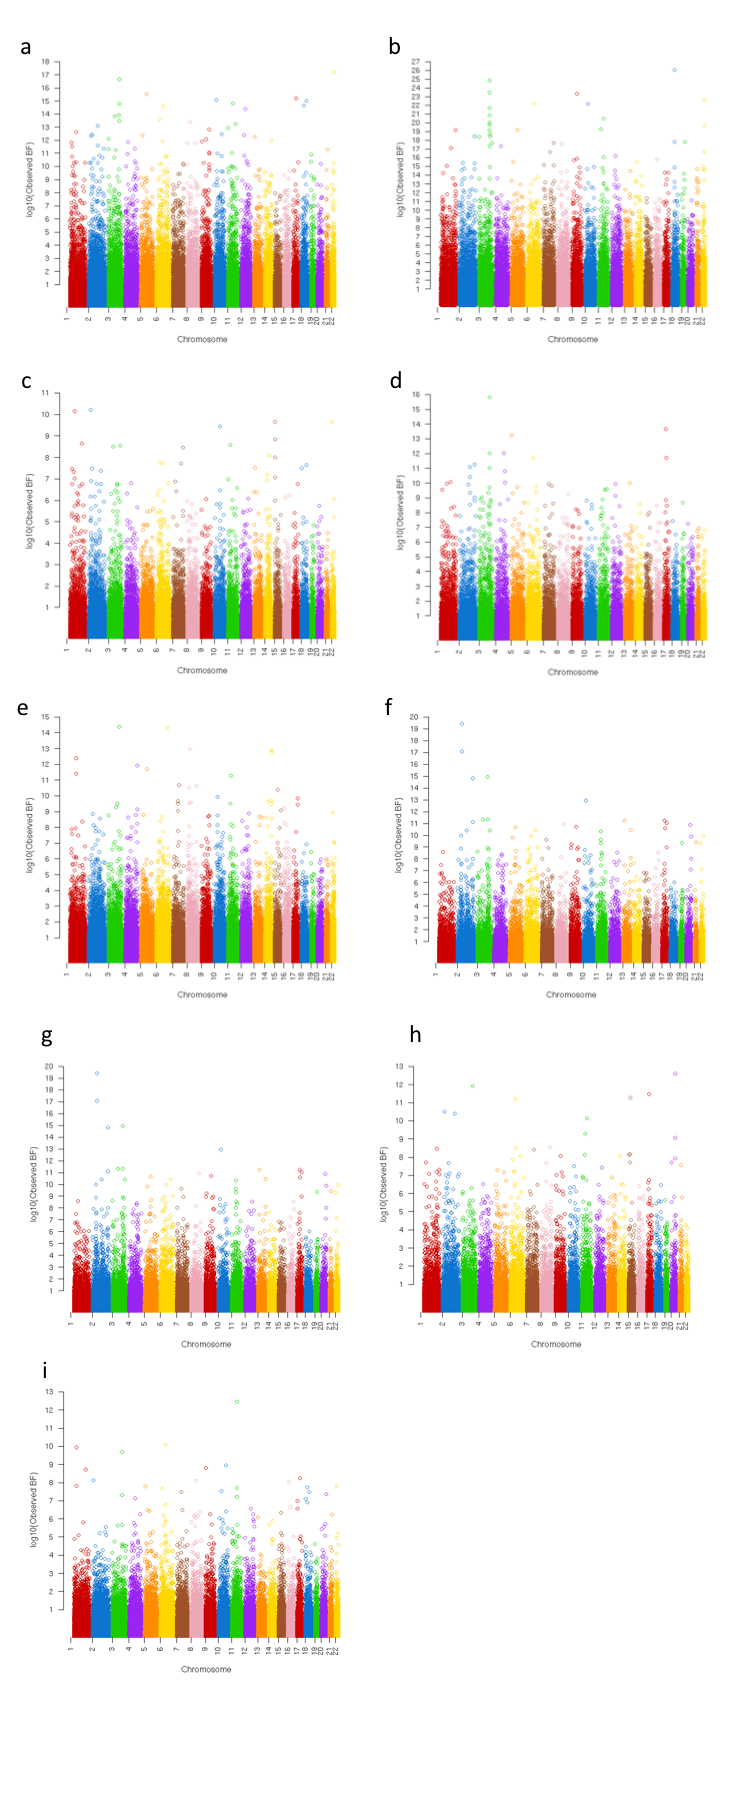


Manhattan plots showing the log10BFs for each variable in the AWE population subset analysis.


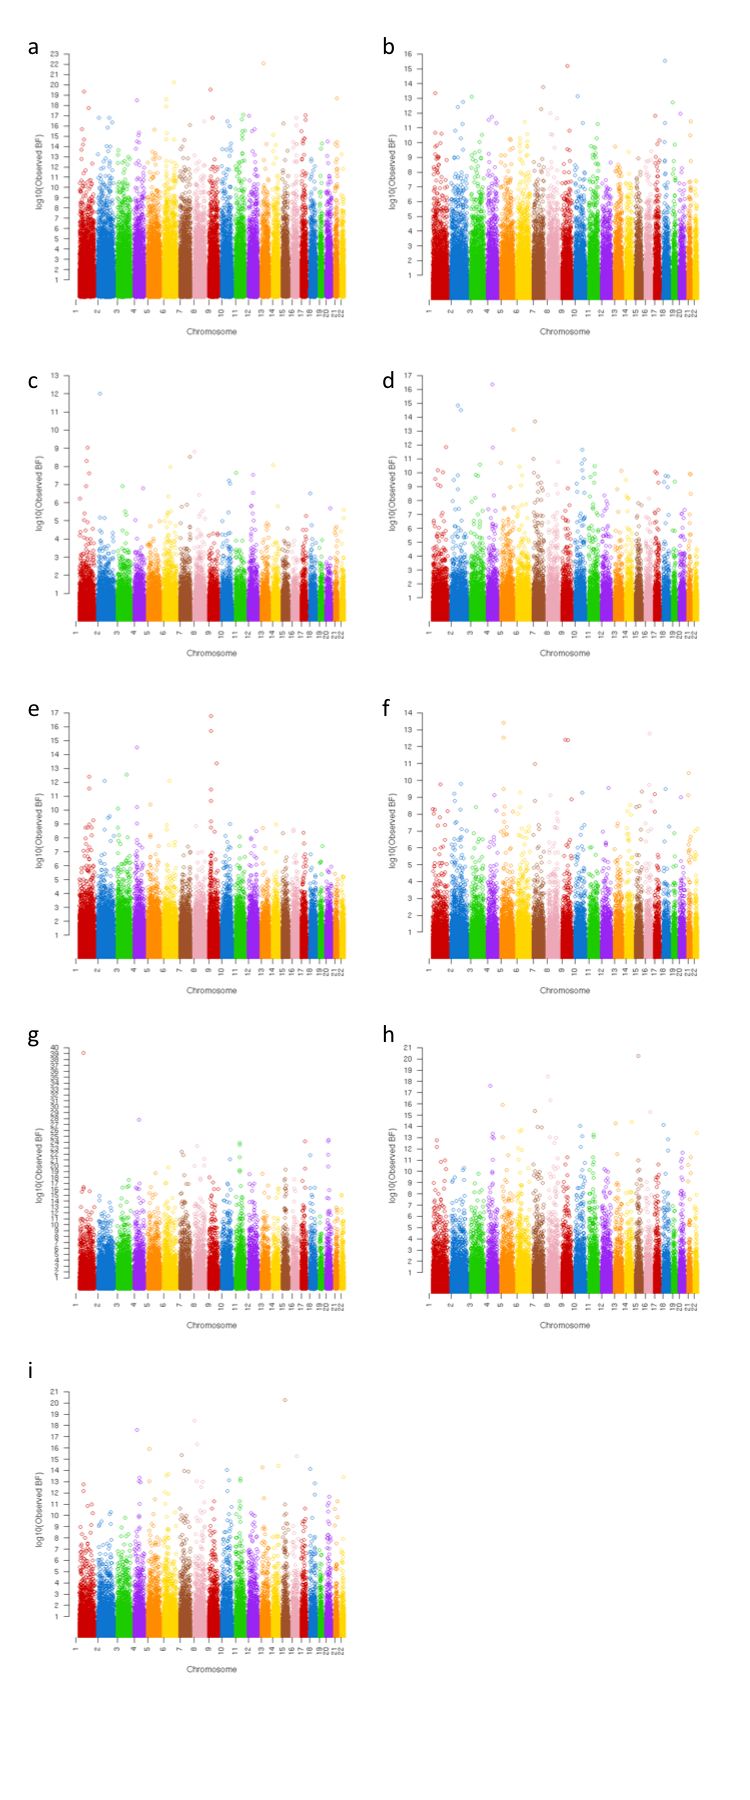


Manhattan plots showing the log10BFs for each variable in the AEA population subset analysis.


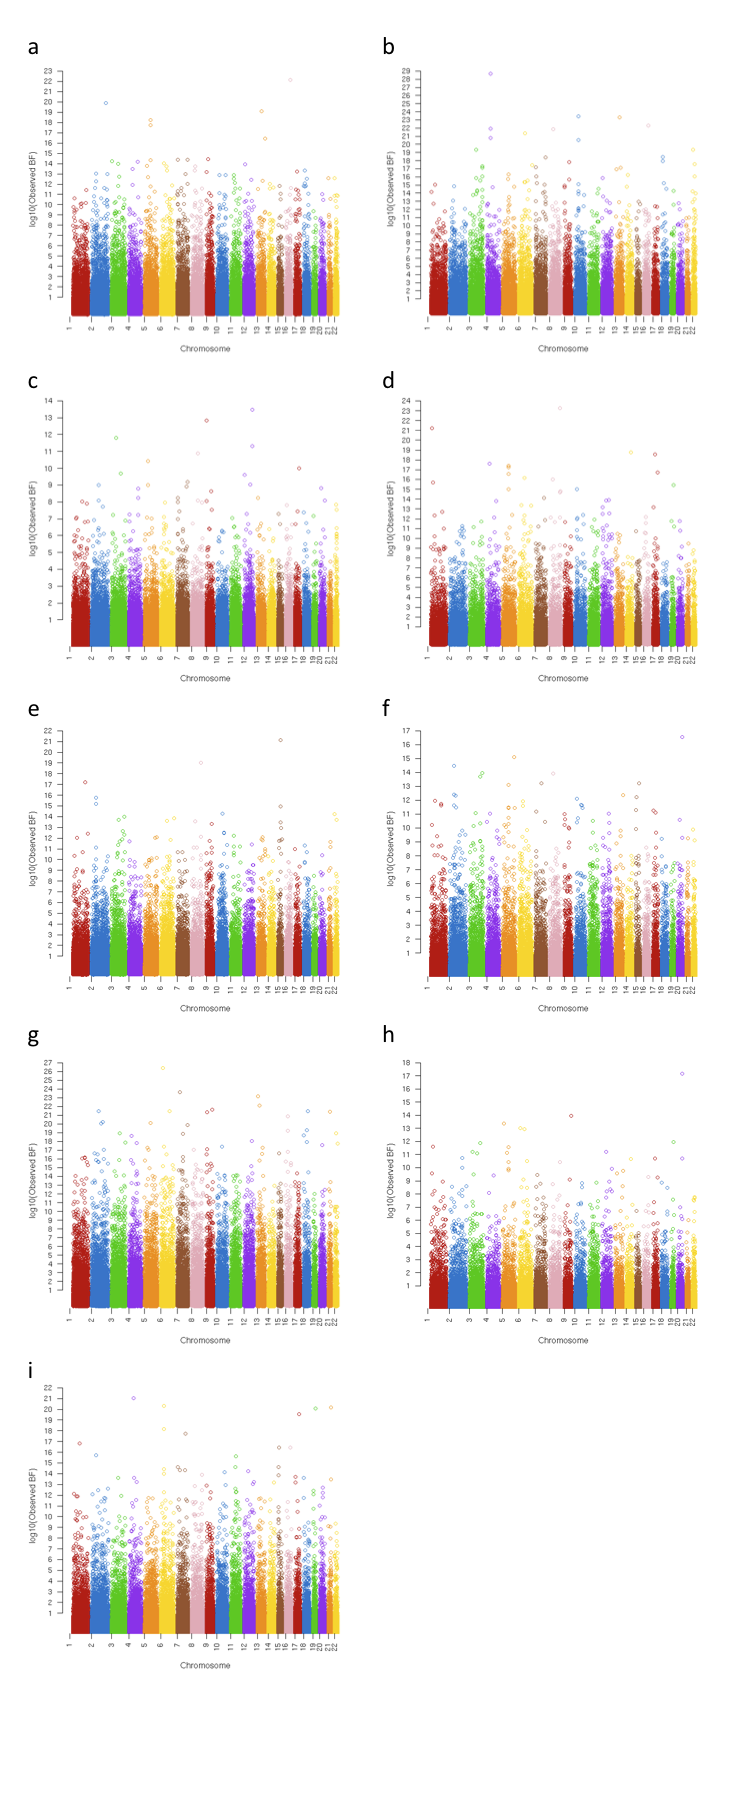

Supplement: Text S3 — Descriptive information about population subsets and comparison to worldwide sample. (2.20 MB DOC) [file pgen.1001375.s014.doc]
